# Supplementary material for: Potential use of text classification tools as signatures of suicidal behavior: A proof-of-concept study using Virginia Woolf’s personal writings
Source: PubMed Central journal article supplement (PMC6200194; doi:10.1371/journal.pone.0204820), 2018-10-24
Supplement: pone.0204820.s011.pdf [file pone.0204820.s011.pdf]

**S1 Table. Words written in the last 60 days before Virginia Woolf's suicide.**

| <b>Words</b> | <b>Frequency</b> |
|--------------|------------------|
| the          | 299              |
| and          | 176              |
| you          | 169              |
| but          | 73               |
| this         | 58               |
| she          | 43               |
| all          | 36               |
| what         | 35               |
| one          | 32               |
| will         | 32               |
| now          | 29               |
| cant         | 27               |
| then         | 26               |
| its          | 24               |
| like         | 24               |
| think        | 22               |
| can          | 21               |
| write        | 21               |
| dear         | 20               |
| time         | 20               |
| dont         | 19               |
| say          | 19               |
| see          | 19               |
| come         | 17               |
| leonard      | 17               |
| must         | 17               |
| read         | 17               |
| shall        | 17               |
| just         | 15               |
| book         | 14               |
| last         | 14               |
| letters      | 13               |
| two          | 13               |
| day          | 12               |
| much         | 12               |
| suppose      | 12               |
| came         | 11               |
| old          | 11               |
| back         | 10               |
| get          | 10               |
| london       | 10               |

|         |    |
|---------|----|
| yes     | 10 |
| letter  | 9  |
| said    | 9  |
| another | 8  |
| life    | 8  |
| vita    | 8  |
| find    | 7  |
| miss    | 7  |
| never   | 7  |
| nothing | 7  |
| story   | 7  |
| great   | 6  |
| little  | 6  |
| house   | 5  |
| war     | 5  |
| blue    | 4  |
| books   | 4  |
| love    | 4  |
