# Supplementary material for: Potential use of text classification tools as signatures of suicidal behavior: A proof-of-concept study using Virginia Woolf’s personal writings
Source: PubMed Central journal article supplement (PMC6200194; doi:10.1371/journal.pone.0204820), 2018-10-24
Supplement: pone.0204820.s012.pdf [file pone.0204820.s012.pdf]

**S2 Table. Different words written in the last 60 days before Virginia Woolf's suicide compared to outside of 60 days prior to Virginia Woolf's suicide.**

| <b>Words</b> | <b>Frequency of word written in the last 60 days before Virginia Woolf's suicide</b> | <b>Frequency of word written outside of the 60 days prior Virginia Woolf's suicide</b> |
|--------------|--------------------------------------------------------------------------------------|----------------------------------------------------------------------------------------|
| you          | 169                                                                                  | 0                                                                                      |
| this         | 58                                                                                   | 0                                                                                      |
| she          | 43                                                                                   | 0                                                                                      |
| all          | 36                                                                                   | 0                                                                                      |
| then         | 26                                                                                   | 0                                                                                      |
| two          | 13                                                                                   | 0                                                                                      |
| suppose      | 12                                                                                   | 0                                                                                      |
| came         | 11                                                                                   | 0                                                                                      |
| yes          | 10                                                                                   | 0                                                                                      |
| said         | 9                                                                                    | 0                                                                                      |
| vita         | 8                                                                                    | 0                                                                                      |
| miss         | 7                                                                                    | 0                                                                                      |
| story        | 7                                                                                    | 0                                                                                      |
| house        | 5                                                                                    | 0                                                                                      |
| war          | 5                                                                                    | 0                                                                                      |
| blue         | 4                                                                                    | 0                                                                                      |
| books        | 4                                                                                    | 0                                                                                      |
| ask          | 0                                                                                    | 14                                                                                     |
| bed          | 0                                                                                    | 17                                                                                     |
| better       | 0                                                                                    | 13                                                                                     |
| bed          | 0                                                                                    | 17                                                                                     |
| good         | 0                                                                                    | 17                                                                                     |
| got          | 0                                                                                    | 17                                                                                     |
| hope         | 0                                                                                    | 20                                                                                     |
| how          | 0                                                                                    | 56                                                                                     |
| know         | 0                                                                                    | 18                                                                                     |
| long         | 0                                                                                    | 20                                                                                     |
| many         | 0                                                                                    | 24                                                                                     |
| may          | 0                                                                                    | 15                                                                                     |
| nice         | 0                                                                                    | 14                                                                                     |
| rather       | 0                                                                                    | 30                                                                                     |
| room         | 0                                                                                    | 13                                                                                     |
| says         | 0                                                                                    | 17                                                                                     |
| seen         | 0                                                                                    | 12                                                                                     |
| tell         | 0                                                                                    | 17                                                                                     |
| though       | 0                                                                                    | 13                                                                                     |

|          |   |    |
|----------|---|----|
| tomorrow | 0 | 6  |
| virginia | 0 | 20 |
| way      | 0 | 6  |
| week     | 0 | 12 |
| well     | 0 | 22 |
