# Supplementary material for: Potential use of text classification tools as signatures of suicidal behavior: A proof-of-concept study using Virginia Woolf’s personal writings
Source: PubMed Central journal article supplement (PMC6200194; doi:10.1371/journal.pone.0204820), 2018-10-24
Supplement: pone.0204820.s013.pdf [file pone.0204820.s013.pdf]

**S3 Table. Words written outside of 60 days prior to Virginia Woolf's suicide.**

| <b>Words</b> | <b>Frequency</b> |
|--------------|------------------|
| the          | 550              |
| and          | 387              |
| but          | 143              |
| will         | 65               |
| like         | 60               |
| one          | 59               |
| how          | 56               |
| think        | 54               |
| its          | 50               |
| can          | 42               |
| see          | 42               |
| what         | 42               |
| write        | 41               |
| shall        | 39               |
| come         | 33               |
| dear         | 33               |
| book         | 31               |
| cant         | 31               |
| now          | 31               |
| rather       | 30               |
| get          | 29               |
| dont         | 27               |
| great        | 27               |
| must         | 27               |
| leonard      | 26               |
| say          | 26               |
| many         | 24               |
| old          | 24               |
| read         | 24               |
| time         | 24               |
| letter       | 23               |
| day          | 22               |
| much         | 22               |
| well         | 22               |
| never        | 21               |
| hope         | 20               |
| long         | 20               |
| virginia     | 20               |
| last         | 19               |
| know         | 18               |
| london       | 18               |

|          |    |
|----------|----|
| back     | 17 |
| bed      | 17 |
| good     | 17 |
| got      | 17 |
| says     | 17 |
| tell     | 17 |
| another  | 15 |
| may      | 15 |
| ask      | 14 |
| nice     | 14 |
| better   | 13 |
| nothing  | 13 |
| room     | 13 |
| though   | 13 |
| love     | 12 |
| seen     | 12 |
| week     | 12 |
| tomorrow | 6  |
| way      | 6  |
