# Supplementary material for: Potential use of text classification tools as signatures of suicidal behavior: A proof-of-concept study using Virginia Woolf’s personal writings
Source: PubMed Central journal article supplement (PMC6200194; doi:10.1371/journal.pone.0204820), 2018-10-24
Supplement: pone.0204820.s014.pdf [file pone.0204820.s014.pdf]

**S4 Table. Common words written in the last 60 days before Virginia Woolf's suicide.**

| <b>Words</b> | <b>Frequency of word written in the last 60 days before Virginia Woolf's suicide</b> | <b>Frequency of word written outside of the 60 days prior Virginia Woolf's suicide</b> |
|--------------|--------------------------------------------------------------------------------------|----------------------------------------------------------------------------------------|
| the          | 299                                                                                  | 550                                                                                    |
| and          | 176                                                                                  | 387                                                                                    |
| but          | 73                                                                                   | 143                                                                                    |
| one          | 32                                                                                   | 59                                                                                     |
| will         | 32                                                                                   | 65                                                                                     |
| now          | 29                                                                                   | 31                                                                                     |
| cant         | 27                                                                                   | 31                                                                                     |
| its          | 24                                                                                   | 50                                                                                     |
| like         | 24                                                                                   | 60                                                                                     |
| think        | 22                                                                                   | 54                                                                                     |
| can          | 21                                                                                   | 42                                                                                     |
| day          | 21                                                                                   | 22                                                                                     |
| write        | 21                                                                                   | 41                                                                                     |
| dear         | 20                                                                                   | 33                                                                                     |
| time         | 20                                                                                   | 24                                                                                     |
| dont         | 19                                                                                   | 27                                                                                     |
| say          | 19                                                                                   | 26                                                                                     |
| see          | 19                                                                                   | 42                                                                                     |
| come         | 17                                                                                   | 33                                                                                     |
| leonard      | 17                                                                                   | 26                                                                                     |
| must         | 17                                                                                   | 27                                                                                     |
| read         | 17                                                                                   | 24                                                                                     |
| shall        | 17                                                                                   | 39                                                                                     |
| book         | 14                                                                                   | 31                                                                                     |
| last         | 14                                                                                   | 19                                                                                     |
| much         | 12                                                                                   | 22                                                                                     |
| old          | 11                                                                                   | 24                                                                                     |
| back         | 10                                                                                   | 17                                                                                     |
| get          | 10                                                                                   | 29                                                                                     |
| london       | 10                                                                                   | 18                                                                                     |
| letter       | 9                                                                                    | 23                                                                                     |
| another      | 8                                                                                    | 15                                                                                     |
| never        | 7                                                                                    | 21                                                                                     |
| nothing      | 7                                                                                    | 13                                                                                     |
| great        | 6                                                                                    | 27                                                                                     |
| love         | 4                                                                                    | 12                                                                                     |
